# Supplementary material
Source: PubMed Central journal article supplement (PMC6664808)
Supplement: NIHMS1034764-supplement-SI.pdf [file NIHMS1034764-supplement-SI.pdf]

## Supplementary Material

### **Pro region engineering of nerve growth factor by deep mutational scanning enables a yeast platform for conformational epitope mapping of anti-NGF monoclonal antibodies**

Angélica V. Medina-Cucurella<sup>a</sup>, Scott J. Bowen<sup>b</sup>, Yaqi Zhu<sup>b</sup>, Lisa M. Bergeron<sup>b</sup>, Timothy A. Whitehead<sup>a,c,d\*</sup>

<sup>a</sup>Department of Chemical Engineering and Materials Science, Michigan State University  
Engineering Building  
428 S. Shaw Lane, Room 2100  
East Lansing, Michigan, 48824 USA

<sup>b</sup>Zoetis Global Therapeutic Research, Veterinary Medicine Research and Development  
  
333 Portage Street  
Kalamazoo, Michigan, 49007 USA

<sup>c</sup>Department of Biosystems and Agricultural Engineering, Michigan State University

<sup>d</sup>Institute for Quantitative Health Science and Engineering, Michigan State University

\*Correspondence to:

Timothy A. Whitehead: [taw@egr.msu.edu](mailto:taw@egr.msu.edu)  
Engineering Building  
428 S. Shaw Lane, Room 2100  
East Lansing, Michigan 48824-1226

Phone: +1 (517) 432-2097

Fax: +1 (517) 432-1105

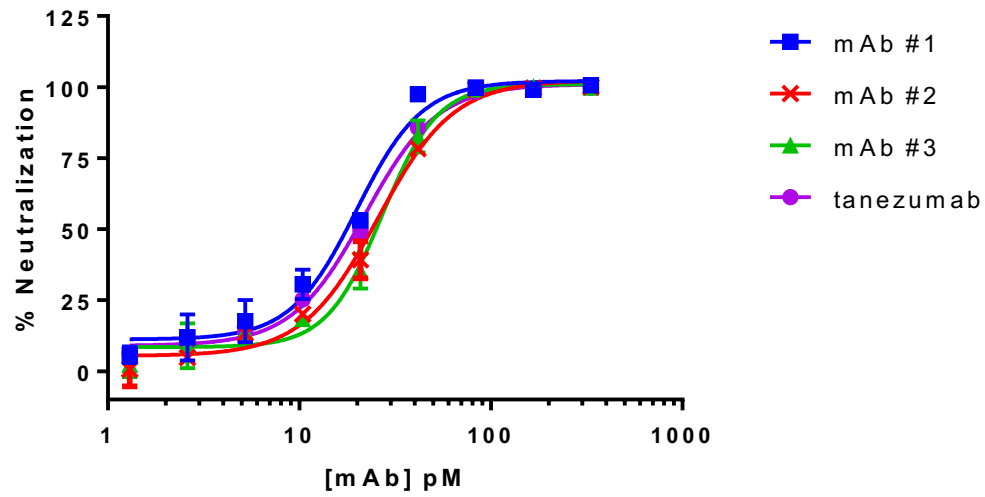

**Supplementary Figure S1.** Effects of anti-NGF mAbs on canine  $\beta$ -NGF Induced Proliferation of TF-1 Cells (representative curves). (error bars, standard deviation, n=2)

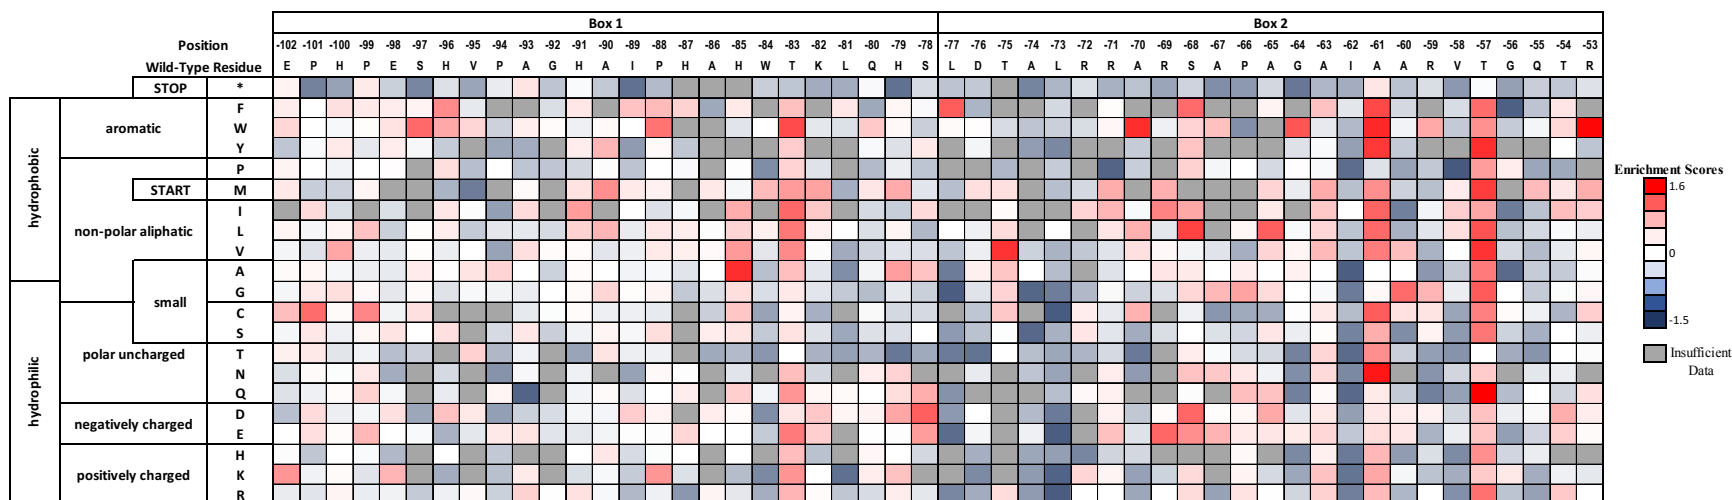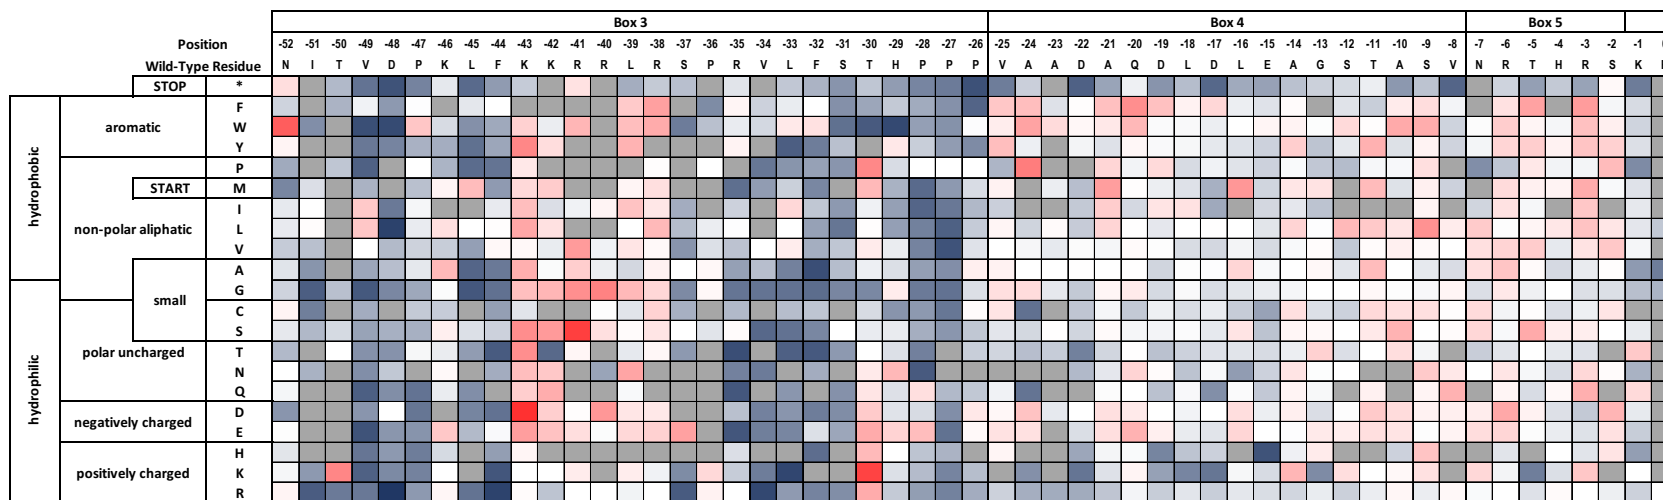

Supplementary Figure S2. Per-position heatmap of enrichment scores for pro-cNGF mutants after 1 sort with tanezumab.

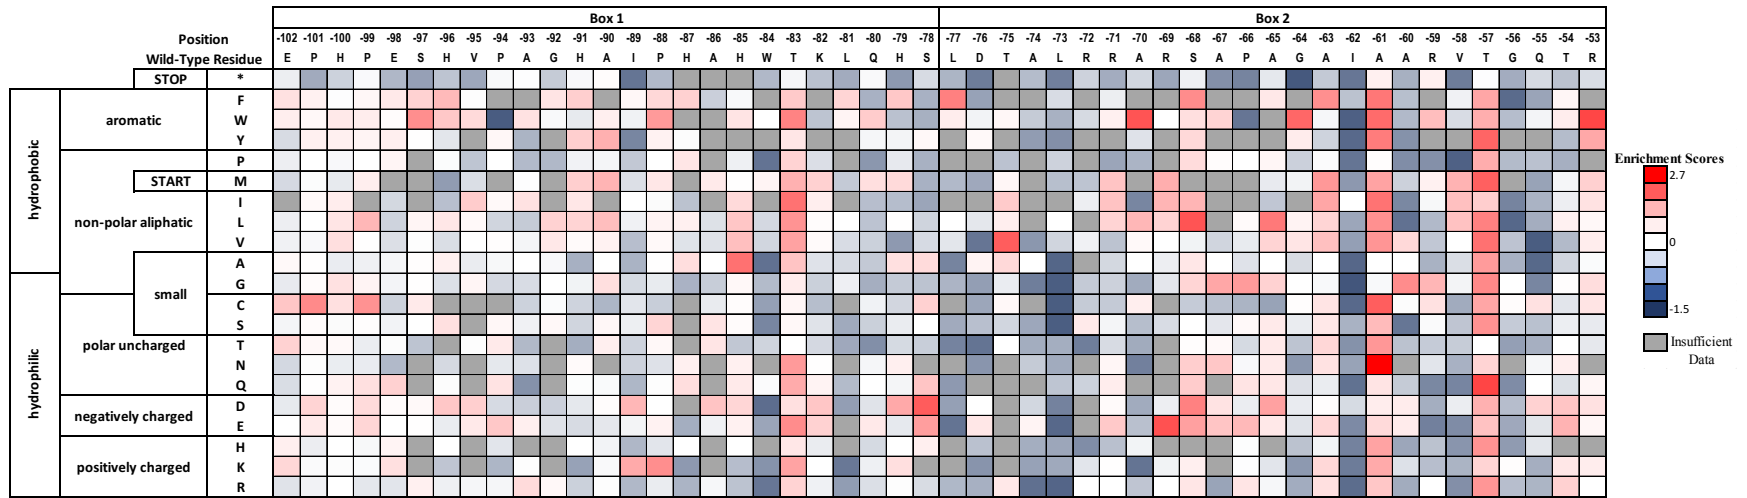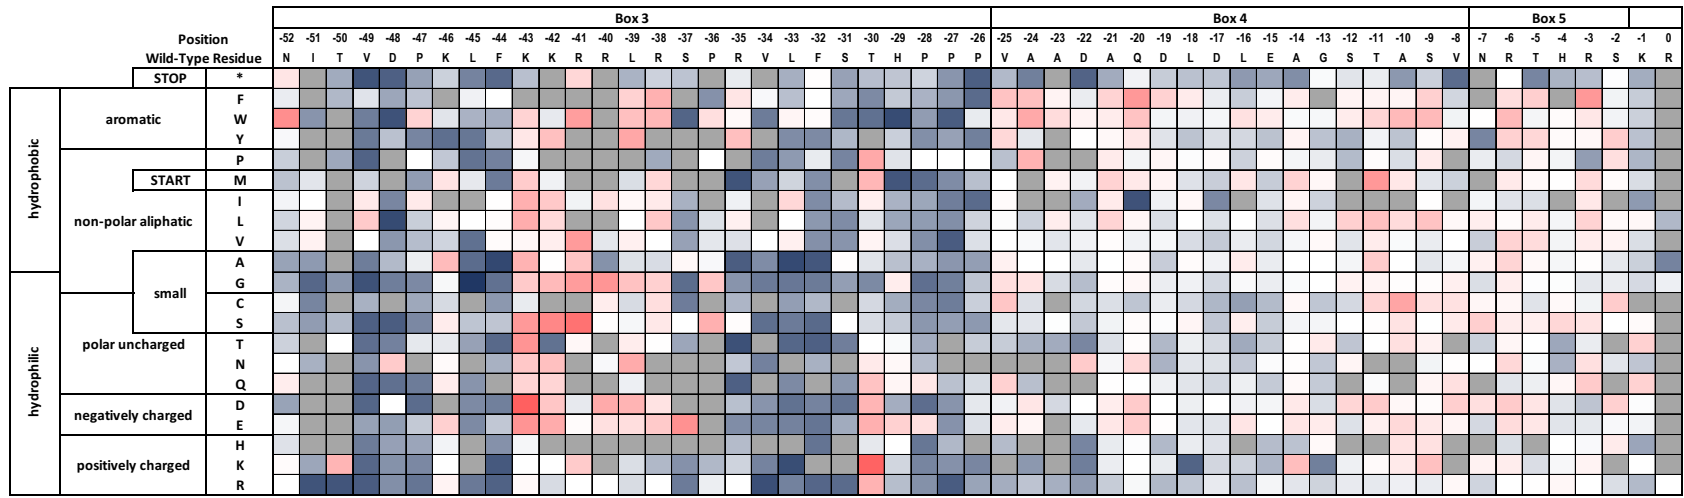

Supplementary Figure S3. Per-position heatmap of enrichment scores for pro-cNGF mutants after 1 sort with mAb #1.



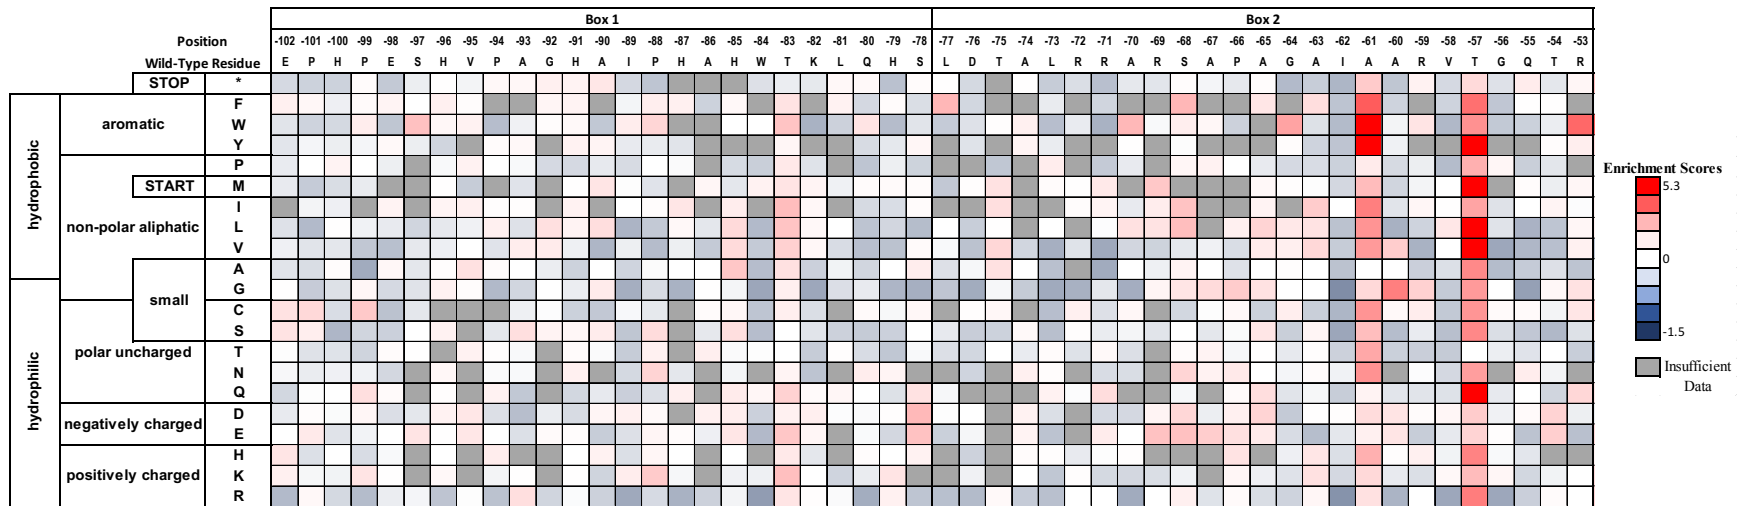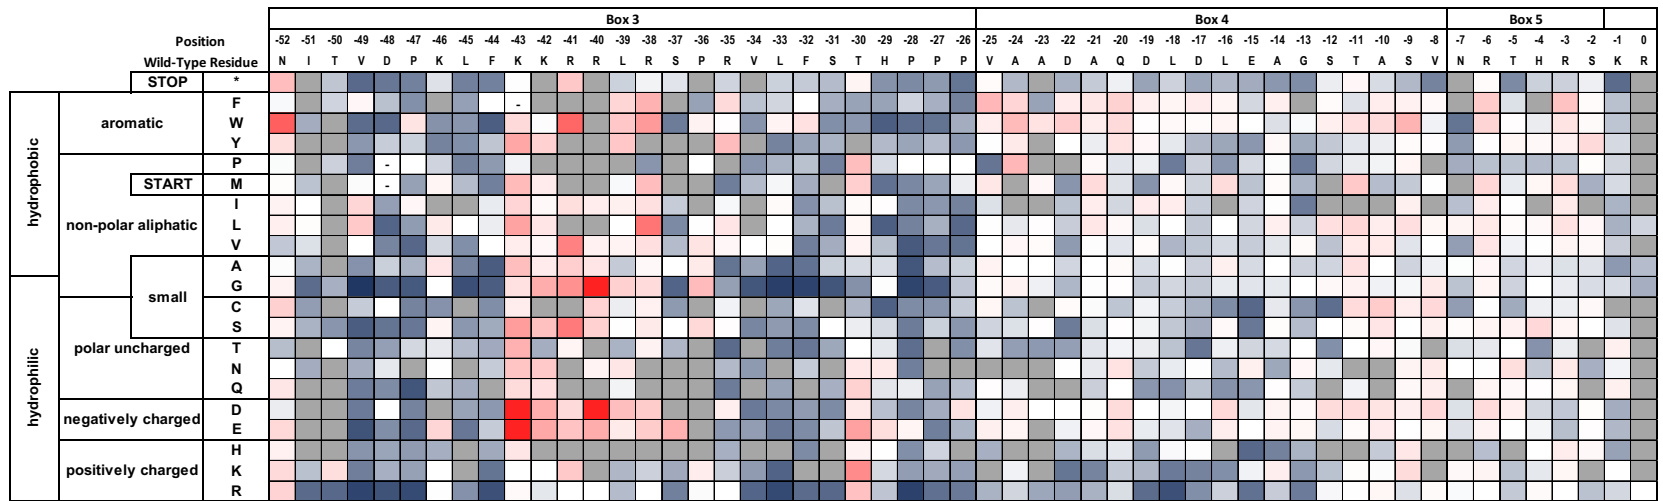

**Supplementary Figure S6.** Per-position heatmap of enrichment scores for pro-cNGF mutants after 2 sorts with mAb #1.

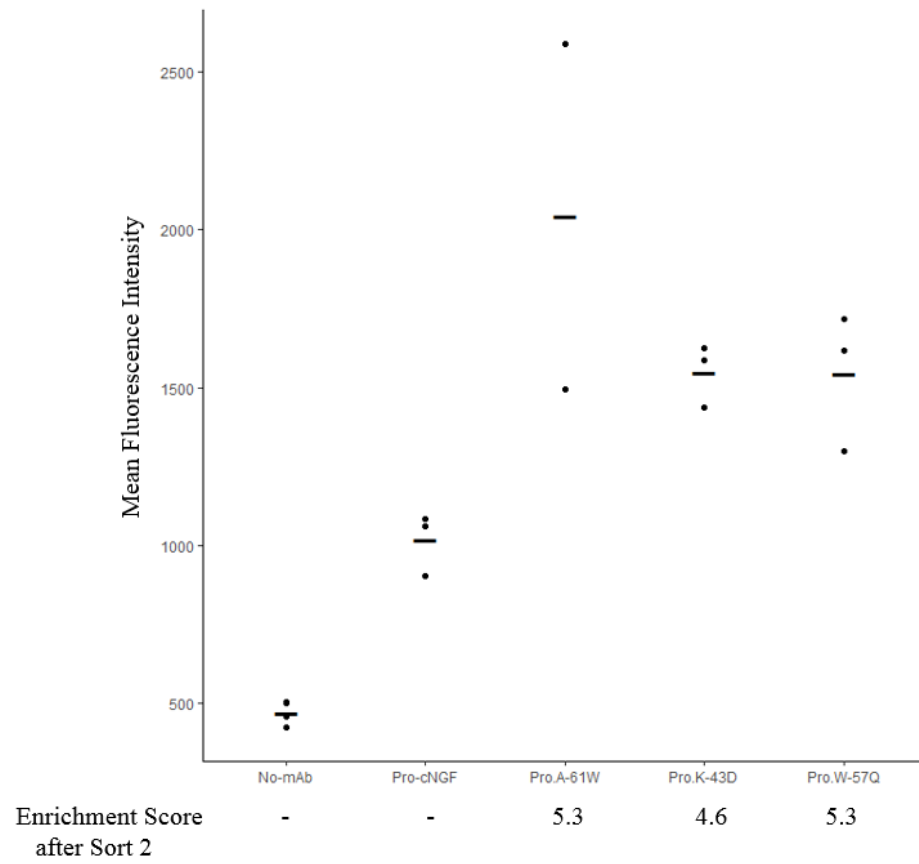

**Supplementary Figure S7.** Mean fluorescence intensities for individual point mutants compared with wild-type pro-cNGF.

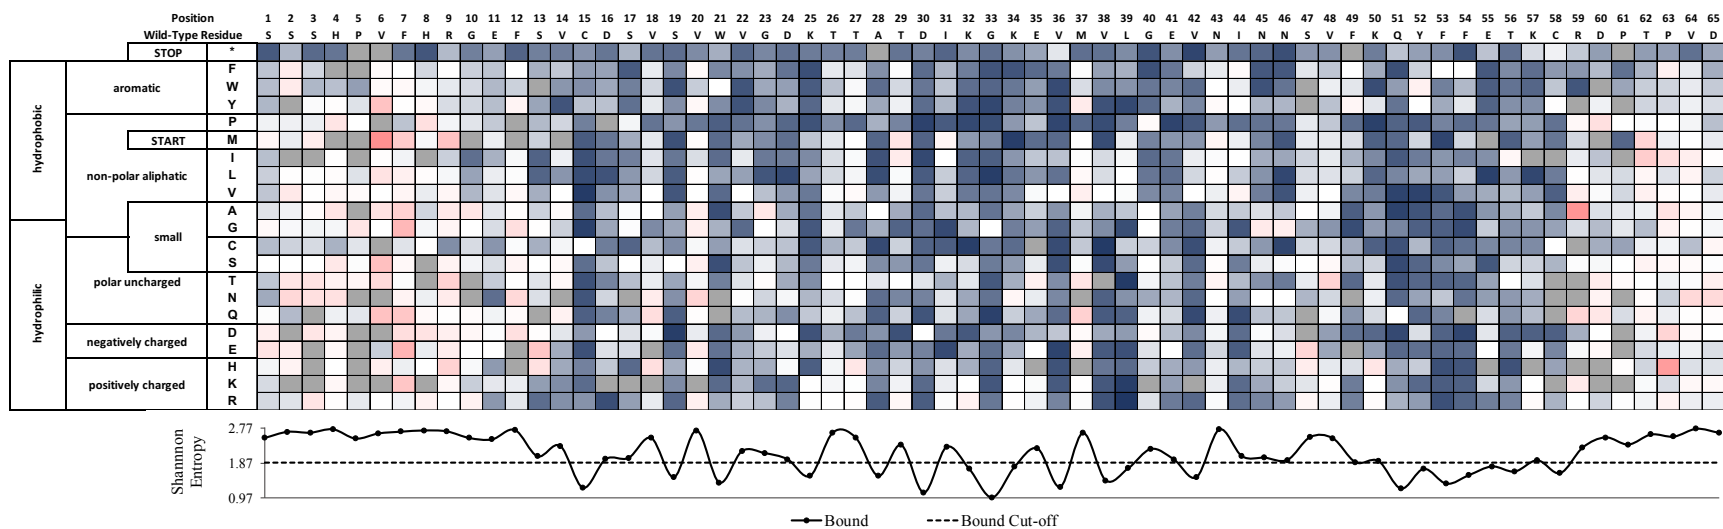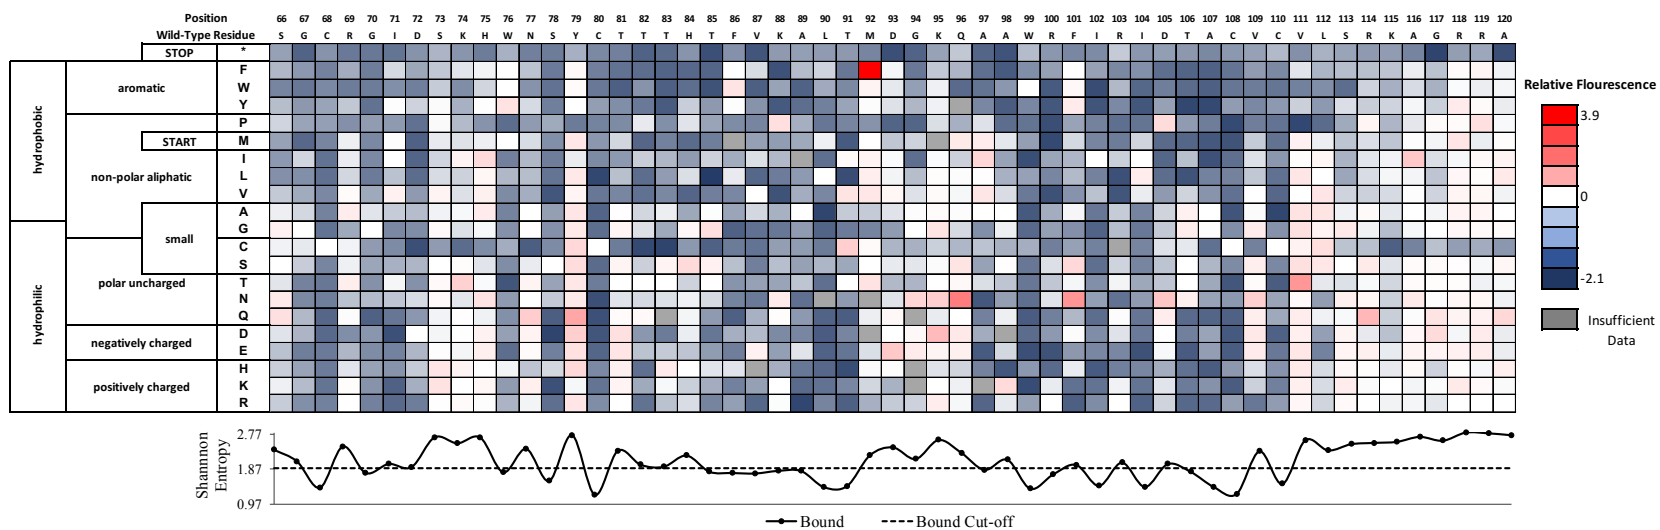

**Supplementary Figure S8.** Determination of conformational epitope for cNGF\_tanezumab. Fitness metric heatmap of the top 7% bound population vs the unselected population. Shannon entropy is plotted below with its respectively cut-off (dashed line).



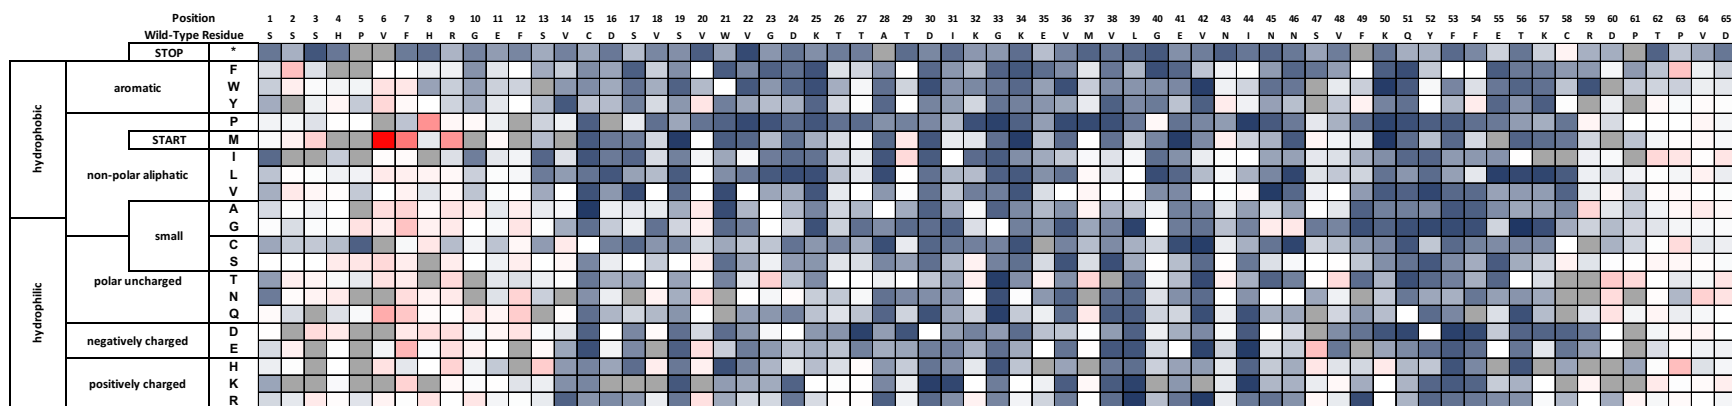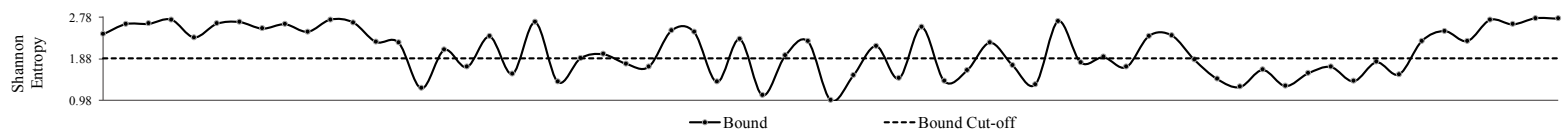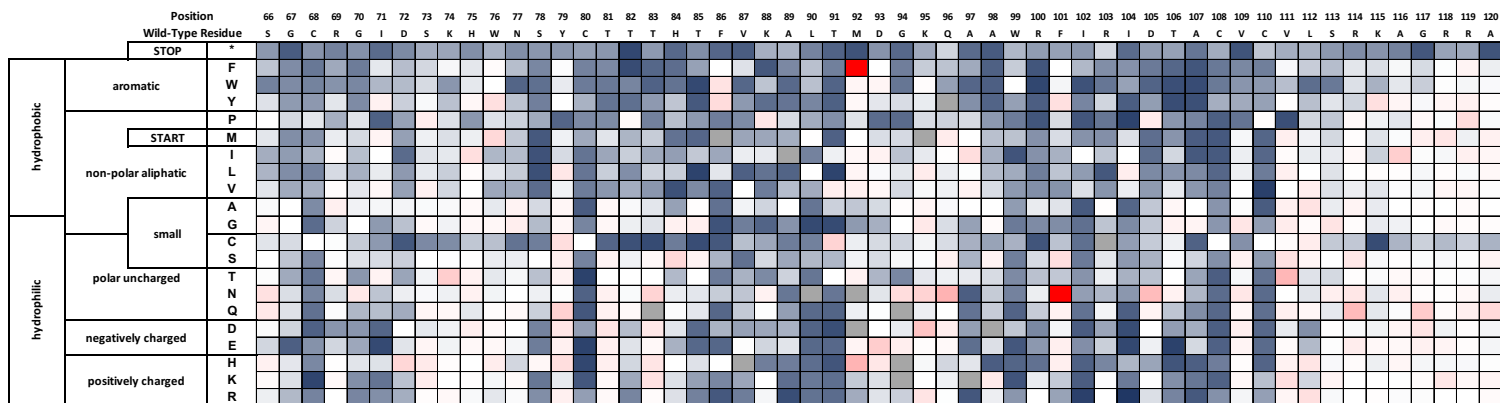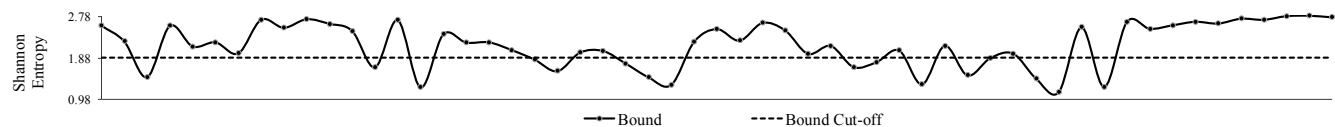

**Supplementary Figure S9.** Determination of conformational epitope for cNGF\_mAb #1 Fitness metric heatmap of the top 7% bound population vs the unselected population. Shannon entropy is plotted below with its respectively cut-off (dashed line).

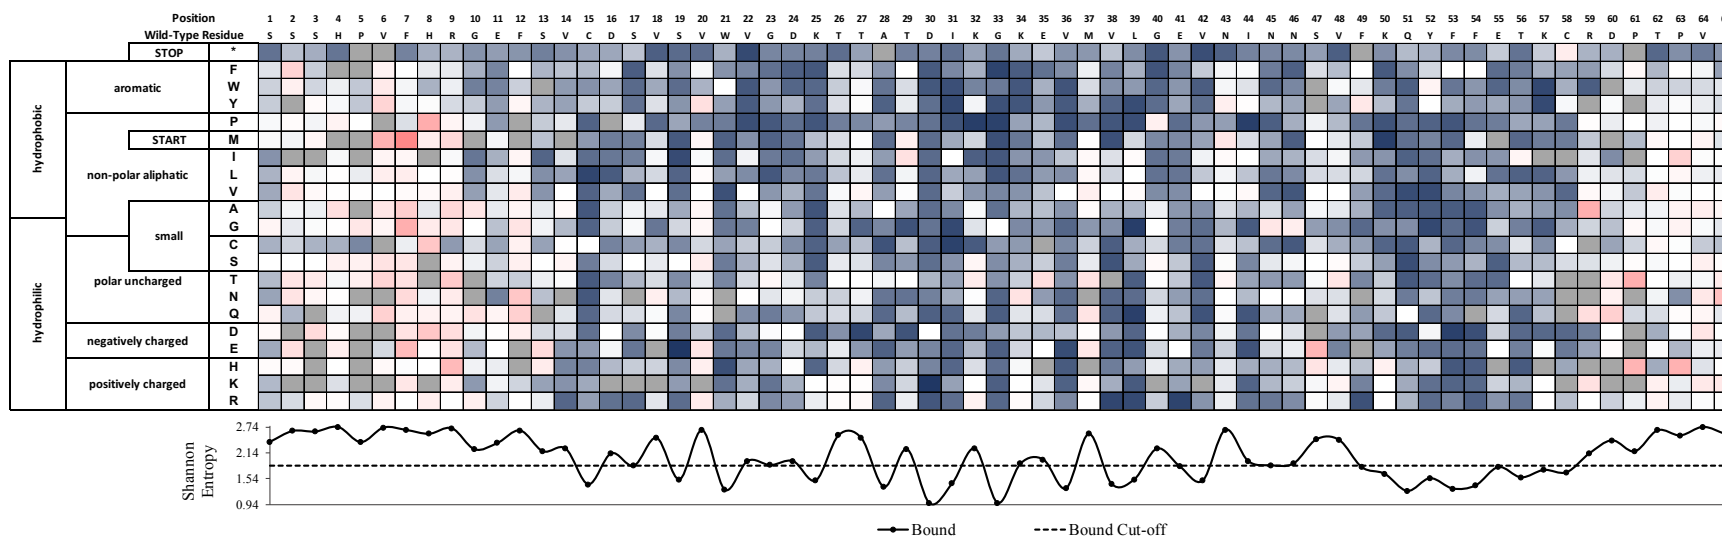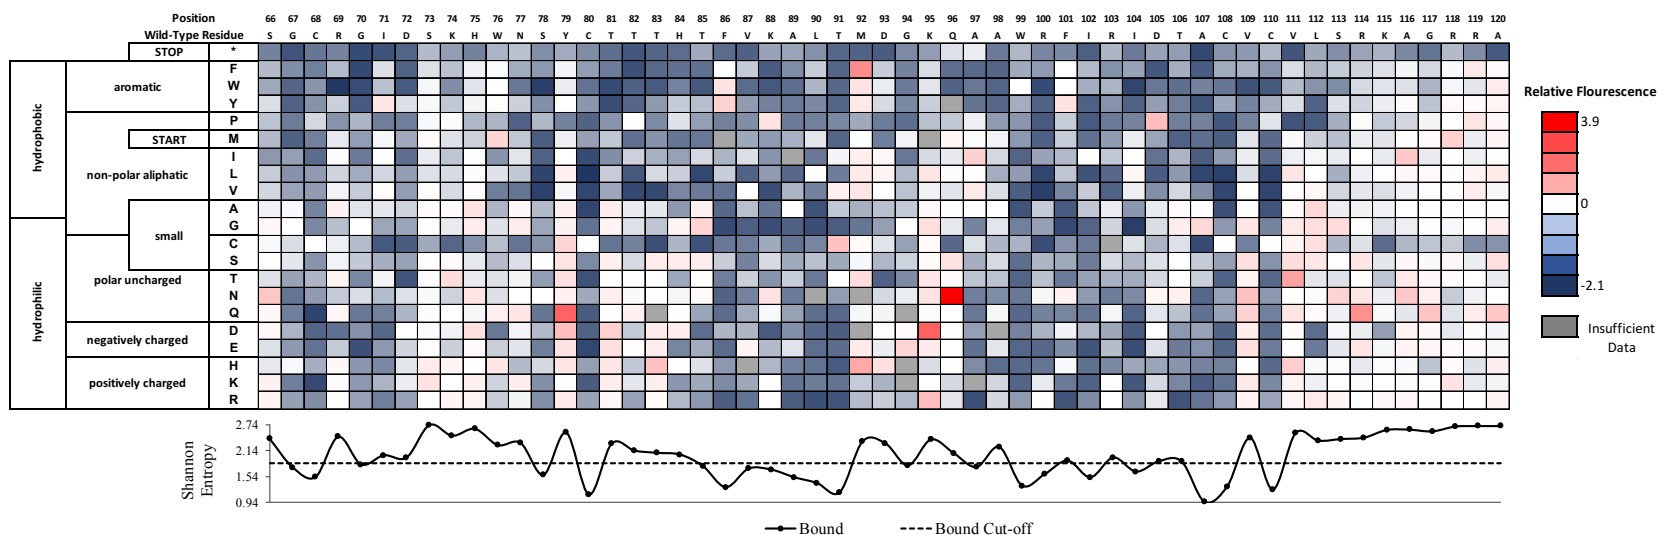

**Supplementary Figure S10.** Determination of conformational epitope for cNGF\_mAb #2. Fitness metric heatmap of the top 7% bound population vs the unselected population. Shannon entropy is plotted below with its respectively cut-off (dashed line).

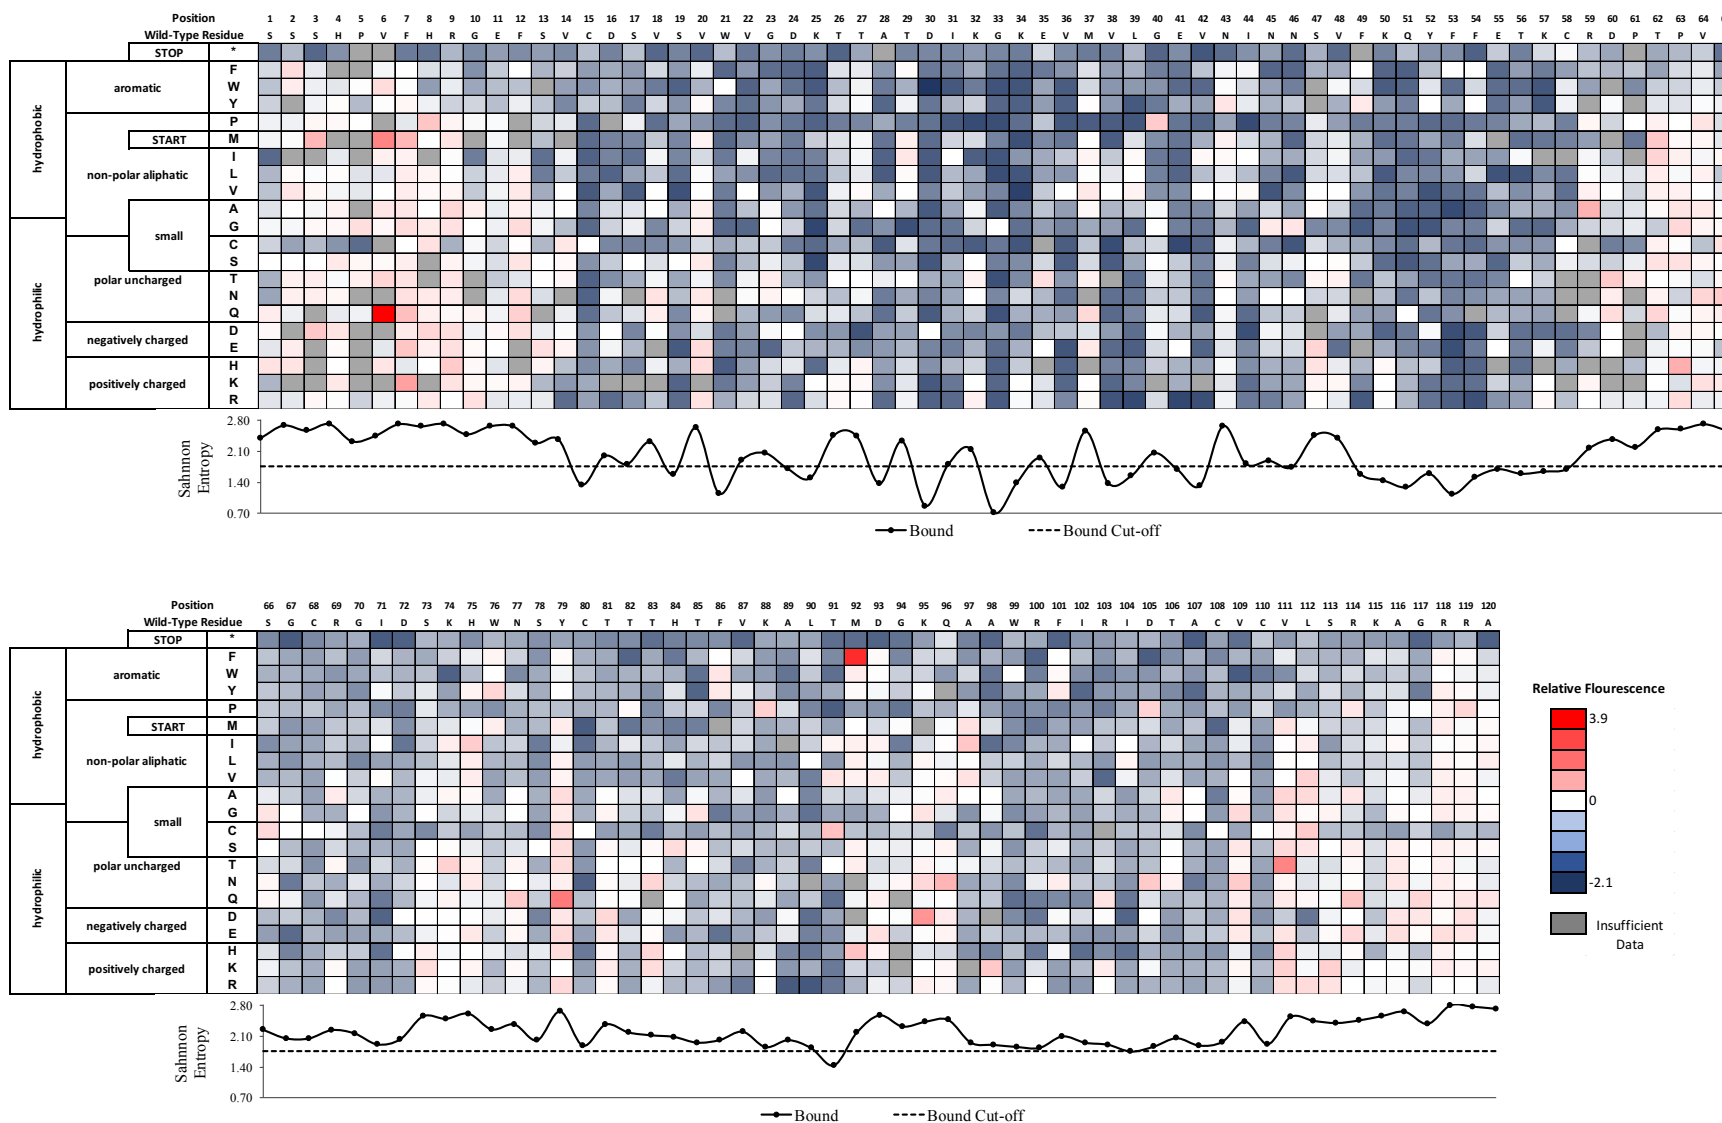

**Supplementary Figure S11.** Determination of conformational epitope for cNGF\_mAb #3. Fitness metric heatmap of the top 7% bound population vs the unselected population. Shannon entropy is plotted below with its respectively cut-off (dashed line).

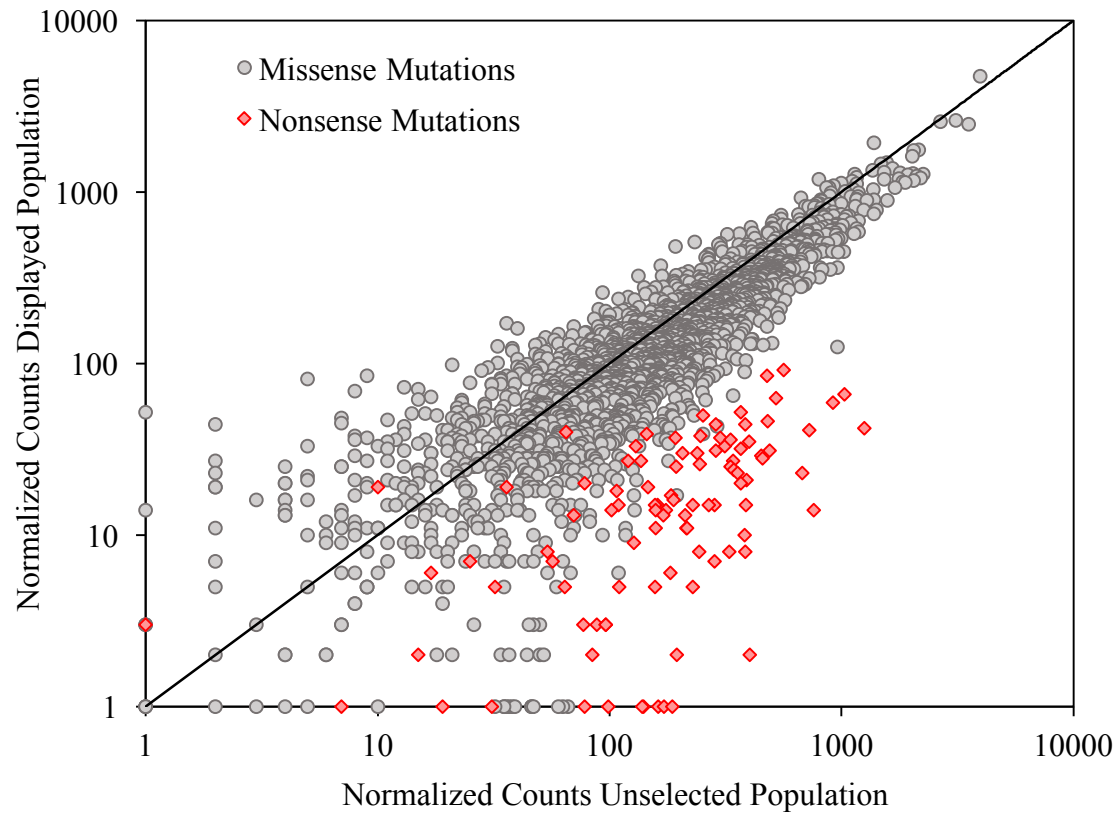

**Supplementary Figure S12.** Correlation between counts in the displayed population relative to the counts in the unselected population for cNGF.

**Supplementary Table S1.** FACS collection statistics for Pro-cNGF and Pro $\Delta$ 1,2-cNGF library screening experiments.

|                                 | Library Size (aa's) | Sort Round 1 |        | Sort Round 2 |        |
|---------------------------------|---------------------|--------------|--------|--------------|--------|
|                                 |                     | tanezumab    | mAb #1 | tanezumab    | mAb #1 |
| Pro-cNGF_tanezumab library 1    | 51                  | 2.9%         | 2.4%   | 3.1%         | 2.7%   |
| Pro-cNGF_tanezumab library 2    | 52                  | 3.3%         | 3.1%   | 2.8%         | 2.8%   |
| Pro $\Delta$ 1,2-cNGF_tanezumab | 56                  | 3.3%         | 3.6%   | -            | -      |

**Supplementary Table S2.** Summary of Average Dissociation Constant,  $K_D$  values using Surface Plasmon Resonance (SPR) for human pro-NGF and canine NGF and Yeast Surface Display (YSD) for pro.v4-cNGF, and sorting conditions for library screening using pro.v4-cNGF. The  $K_D$  values from SPR were obtained using the 1:1 binding model. Error bars represent 1 standard deviation of the regression. One tail t-test assuming unequal variances was used to calculate p-values for Hill coefficients. ( $n \geq 3$ )

| mAb       | Surface Plasmon Resonance Data |      |                           |      |                           |      | Yeast Surface Display Data                             |                                                      |                                                         |                         |                                |
|-----------|--------------------------------|------|---------------------------|------|---------------------------|------|--------------------------------------------------------|------------------------------------------------------|---------------------------------------------------------|-------------------------|--------------------------------|
|           | Human Pro-NGF                  |      | Human NGF                 |      | Canine NGF                |      | Average $K_D$ values with Hill coefficient, $H=1$ [pM] | Labeling Concentrations for Screening Libraries [pM] | Average $K_D$ values varying Hill coefficient, $H$ [pM] | Hill coefficient values | p- values for Hill coefficient |
|           | Average $K_D$ values [pM]      | Chi2 | Average $K_D$ values [pM] | Chi2 | Average $K_D$ values [pM] | Chi2 |                                                        |                                                      |                                                         |                         |                                |
| tanezumab | 1610                           | 0.01 | 15.9                      | 1.26 | 19                        | 0.77 | 801 $\pm$ 164                                          | 400.6                                                | 1319 $\pm$ 200                                          | 0.66 $\pm$ 0.05         | 0.0033                         |
| mAb #1    | 286                            | 0.22 | 0.243                     | 2.32 | 0.118                     | 1.92 | 209 $\pm$ 65                                           | 104.6                                                | 189 $\pm$ 36                                            | 0.70 $\pm$ 0.18         | 0.0103                         |
| mAb #2    | 48                             | 0.05 | 0.308                     | 1.47 | 0.074                     | 1.29 | 307 $\pm$ 173                                          | 153.6                                                | 461 $\pm$ 300                                           | 0.62 $\pm$ 0.09         | 0.0003                         |
| mAb #3    | 2500                           | 0.07 | 1.24                      | 5.36 | 0.179                     | 4.92 | 143 $\pm$ 44                                           | 71.6                                                 | 325 $\pm$ 328                                           | 0.58 $\pm$ 0.19         | 0.0106                         |

**Supplementary Table S3.** FACS collection statistics for cNGF libraries.

| mAb       | Amount of collected cells | cNGF                   |                        |
|-----------|---------------------------|------------------------|------------------------|
|           |                           | Library 1<br>(90 aa's) | Library 2<br>(90 aa's) |
| tanezumab | 250,000                   | 8.01%                  | 6.10%                  |
| mAb #1    | 250,000                   | 7.36%                  | 6.33%                  |
| mAb #2    | 250,000                   | 7.28%                  | 6.60%                  |
| mAb #3    | 250,000                   | 6.59%                  | 8.48%                  |

**Supplementary Table S4.** Primers set for deep sequencing. L1: library 1, L2: library 2, **Blue:** Illumina Universal Sequence, **NNNNNN:** Indexing Barcode, and **Green:** Illumina Adapter

| Name                         | Sequence                                                                                 |
|------------------------------|------------------------------------------------------------------------------------------|
| <b>Inner Primers</b>         |                                                                                          |
| Pro-cNGF_L1_FWD              | 5'- <b>G TTCAGAGTTCTACAGTCCGACGATCGATGACGACAAGCATATG</b> -3'                             |
| Pro-cNGF_L1_REV              | 5'- <b>CCTTGGCACCCGAGAATTCCA</b> AACTTTGGATCAACTGTGAT -3'                                |
| Pro-cNGF_L2_FWD              | 5'- <b>G TTCAGAGTTCTACAGTCCGACGATC</b> TTACAGGTCAAAGTAACTAGAAAC-3'                       |
| Pro-cNGF_L2_REV              | 5'- <b>CCTTGGCACCCGAGAATTCCA</b> AACTGGATGAGATGAAGA -3'                                  |
| Pro $\Delta$ 1,2-cNGF_FWD    | 5'- <b>G TTCAGAGTTCTACAGTCCGACGATCGATGACGACAAGCATATG</b> -3'                             |
| Pro $\Delta$ 1,2-cNGF_REV    | 5'- <b>CCTTGGCACCCGAGAATTCCA</b> AACTGGATGAGATGAAGA -3'                                  |
| cNGF_L1_FWD                  | 5'- <b>G TTCAGAGTTCTACAGTCCGACGATCA</b> ACTGGATGAGATGAAGA -3'                            |
| cNGF_L1_REV                  | 5'- <b>CCTTGGCACCCGAGAATTCCA</b> ATCAACTGGAGTTGG -3'                                     |
| cNGF_L2_FWD                  | 5'- <b>G TTCAGAGTTCTACAGTCCGACGATC</b> CTTTTTTGAACAAAATGTAGAGAT -3'                      |
| cNGF_L2_REV                  | 5'- <b>CCTTGGCACCCGAGAATTCCA</b> GCCTCCTCCACC -3'                                        |
| <b>Foward Outer Primer</b>   |                                                                                          |
| Illumina_FWD                 | 5'- <b>AATGATACGGCGACCACCGAGATCTACACGTT</b> <b>CAGAGTTCTACAGTCCGACGATC</b> - 3'          |
| <b>Reverse Outer Primers</b> |                                                                                          |
| Pro-cNGF_L1_Unsel            | 5'- <b>CAAGCAGAAGACGGCATA</b> CGAGAT <b>TGACATGTGACTGGAGTTCCTTGGCACCCGAGAATTCCA</b> - 3' |
| Pro-cNGF_L1_Display          | 5'- <b>CAAGCAGAAGACGGCATA</b> CGAGAT <b>GGACGGGTGACTGGAGTTCCTTGGCACCCGAGAATTCCA</b> - 3' |
| Pro-cNGF_L1_tanezumab        | 5'- <b>CAAGCAGAAGACGGCATA</b> CGAGAT <b>CTCTACGTGACTGGAGTTCCTTGGCACCCGAGAATTCCA</b> - 3' |

|                          |                                                                                   |
|--------------------------|-----------------------------------------------------------------------------------|
| Pro-cNGF_L1_mAb #1       | 5'- CAAGCAGAAGACGGCATAACGAGAT <b>GCGGACGTGACTGGAGTTCCTTGGCACCCGAGAATTCCA</b> - 3' |
| Pro-cNGF_L2_Unsel        | 5'- CAAGCAGAAGACGGCATAACGAGAT <b>TTTCACGTGACTGGAGTTCCTTGGCACCCGAGAATTCCA</b> - 3' |
| Pro-cNGF_L2_Display      | 5'- CAAGCAGAAGACGGCATAACGAGAT <b>GGCCACGTGACTGGAGTTCCTTGGCACCCGAGAATTCCA</b> - 3' |
| Pro-cNGF_L2_tanezumab    | 5'- CAAGCAGAAGACGGCATAACGAGAT <b>CGAAACGTGACTGGAGTTCCTTGGCACCCGAGAATTCCA</b> - 3' |
| Pro-cNGF_L2_mAb #1       | 5'- CAAGCAGAAGACGGCATAACGAGAT <b>CGTACGGTGACTGGAGTTCCTTGGCACCCGAGAATTCCA</b> - 3' |
| ProΔ1,2-cNGF_Unsel       | 5'- <b>CAAGCAGAAGACGGCATAACGAGATCCACTCGTGACTGGAGTTCCTTGGCACCCGAGAATTCCA</b> - 3'  |
| ProΔ1,20-NGF_Display     | 5'- CAAGCAGAAGACGGCATAACGAGAT <b>GCTACCGTGACTGGAGTTCCTTGGCACCCGAGAATTCCA</b> - 3' |
| ProΔ1,2-cNGF_tanezumab   | 5'- CAAGCAGAAGACGGCATAACGAGAT <b>ATCAGTGTGACTGGAGTTCCTTGGCACCCGAGAATTCCA</b> - 3' |
| ProΔ1,2-cNGF_mAb #1      | 5'- CAAGCAGAAGACGGCATAACGAGAT <b>GCTCATGTGACTGGAGTTCCTTGGCACCCGAGAATTCCA</b> - 3' |
| Pro-cNGF_L1_S2_tanezumab | 5'- CAAGCAGAAGACGGCATAACGAGAT <b>AGGAATGTGACTGGAGTTCCTTGGCACCCGAGAATTCCA</b> - 3' |
| Pro-cNGF_L1_S2_mAb #1    | 5'- CAAGCAGAAGACGGCATAACGAGAT <b>CTTTTGGTGACTGGAGTTCCTTGGCACCCGAGAATTCCA</b> - 3' |
| Pro-cNGF_L2_S2_tanezumab | 5'- CAAGCAGAAGACGGCATAACGAGAT <b>TAGTTGGTGACTGGAGTTCCTTGGCACCCGAGAATTCCA</b> - 3' |
| Pro-cNGF_L2_S2_mAb #1    | 5'- CAAGCAGAAGACGGCATAACGAGAT <b>CCGGTGGTGACTGGAGTTCCTTGGCACCCGAGAATTCCA</b> - 3' |
| cNGF_L1_Unsel            | 5'- CAAGCAGAAGACGGCATAACGAGAT <b>CGTGATGTGACTGGAGTTCCTTGGCACCCGAGAATTCCA</b> - 3' |
| cNGF_L1_Display          | 5'- CAAGCAGAAGACGGCATAACGAGAT <b>ACATCGGTGACTGGAGTTCCTTGGCACCCGAGAATTCCA</b> - 3' |
| cNGF_L1_mAb #1           | 5'- CAAGCAGAAGACGGCATAACGAGAT <b>GCCTAAGTGACTGGAGTTCCTTGGCACCCGAGAATTCCA</b> - 3' |
| cNGF_L1_mAb #2           | 5'- CAAGCAGAAGACGGCATAACGAGAT <b>TGGTCAGTGACTGGAGTTCCTTGGCACCCGAGAATTCCA</b> - 3' |
| cNGF_L1_mAb #3           | 5'- CAAGCAGAAGACGGCATAACGAGAT <b>CACTGTGTGACTGGAGTTCCTTGGCACCCGAGAATTCCA</b> - 3' |
| cNGF_L1_tanezumab        | 5'- CAAGCAGAAGACGGCATAACGAGAT <b>ATTGGCGTGACTGGAGTTCCTTGGCACCCGAGAATTCCA</b> - 3' |
| cNGF_L2_Unsel            | 5'- CAAGCAGAAGACGGCATAACGAGAT <b>CTGATCGTGACTGGAGTTCCTTGGCACCCGAGAATTCCA</b> - 3' |
| cNGF_L2_Display          | 5'- CAAGCAGAAGACGGCATAACGAGAT <b>AAGCTAGTGACTGGAGTTCCTTGGCACCCGAGAATTCCA</b> - 3' |
| cGF_L2_mAb #1            | 5'- CAAGCAGAAGACGGCATAACGAGAT <b>GTAGCCGTGACTGGAGTTCCTTGGCACCCGAGAATTCCA</b> - 3' |
| cNGF_L2_mAb #2           | 5'- CAAGCAGAAGACGGCATAACGAGAT <b>TACAAGGTGACTGGAGTTCCTTGGCACCCGAGAATTCCA</b> - 3' |
| cNGF_L2_mAb #3           | 5'- CAAGCAGAAGACGGCATAACGAGAT <b>TTGACTGTGACTGGAGTTCCTTGGCACCCGAGAATTCCA</b> - 3' |
| cNGF_L2_tanezumab        | 5'- CAAGCAGAAGACGGCATAACGAGAT <b>GGAACGTGACTGGAGTTCCTTGGCACCCGAGAATTCCA</b> - 3'  |

Supplementary Table S5. Library Statistics Results.

|                                                                                              | <i>Pro-cNGF</i> |               | <i>Pro<math>\Delta</math>1,2-cNGF</i> | <i>NGF</i>    |               |
|----------------------------------------------------------------------------------------------|-----------------|---------------|---------------------------------------|---------------|---------------|
|                                                                                              | <i>Tile 1</i>   | <i>Tile 2</i> |                                       | <i>Tile 1</i> | <i>Tile 2</i> |
| <b><i>Percent of possible codon substitutions observed in the unselected population:</i></b> |                 |               |                                       |               |               |
| 1-base substitution                                                                          | 96.50%          | 95.10%        | 94.20%                                | 98.70%        | 99.80%        |
| 2-base substitutions                                                                         | 59.50%          | 52.80%        | 53.20%                                | 55.70%        | 60.00%        |
| 3-base substitutions                                                                         | 47.40%          | 43.20%        | 44.80%                                | 44.50%        | 47.90%        |
| <b><i>Percent of unselected reads with:</i></b>                                              |                 |               |                                       |               |               |
| No nonsynonymous mutations:                                                                  | 35.20%          | 30.80%        | 28.60%                                | 39.50%        | 34.50%        |
| One nonsynonymous mutation:                                                                  | 56.00%          | 61.80%        | 56.60%                                | 55.40%        | 57.10%        |
| Multiple nonsynonymous mutations:                                                            | 8.80%           | 7.40%         | 14.80%                                | 5.10%         | 8.50%         |
| <b>Coverage of possible single nonsynonymous amino acid mutations:</b>                       | <b>85.50%</b>   | <b>83.20%</b> | <b>84.20%</b>                         | <b>92.90%</b> | <b>98.20%</b> |
